# Supplementary material for: The genomic epidemiology of multi-drug resistant invasive non-typhoidal Salmonella in selected sub-Saharan African countries
Source: HighWire-hosted journal article supplement (doi:10.1136/bmjgh-2021-005659), 2021-08-01
Supplement: bmjgh-2021-005659supp002_data_supplement.pdf [file bmjgh-2021-005659supp002_data_supplement.pdf]

| ID1         | ID2              | lineage | Strain      | MLST | Continent | Country      |
|-------------|------------------|---------|-------------|------|-----------|--------------|
| 16404_4#72  | 16404_4#72_2010  | L2      | Typhimurium | 313  | Africa    | GuineaBissau |
| 16404_4#54  | 16404_4#54_2010  | L2      | Typhimurium | 313  | Africa    | Ghana        |
| 16404_5#1   | 16404_5#1_2010   | L2      | Typhimurium | 313  | Africa    | Ghana        |
| 16404_5#15  | 16404_5#15_2010  | L2      | Typhimurium | 313  | Africa    | Ghana        |
| 16404_5#16  | 16404_5#16_2010  | L2      | Typhimurium | 313  | Africa    | Ghana        |
| 16404_5#25  | 16404_5#25_2010  | L2      | Typhimurium | 313  | Africa    | Ghana        |
| 16404_5#32  | 16404_5#32_2010  | L2      | Typhimurium | 313  | Africa    | Ghana        |
| 16404_5#73  | 16404_5#73_2010  | L2      | Typhimurium | 313  | Africa    | Ghana        |
| 16404_5#8   | 16404_5#8_2010   | L2      | Typhimurium | 313  | Africa    | Ghana        |
| 16404_6#75  | 16404_6#75_2010  | L2      | Typhimurium | 313  | Africa    | Ghana        |
| 16549_7#28  | 16549_7#28_2010  | L2      | Typhimurium | 313  | Africa    | Ghana        |
| 16549_7#44  | 16549_7#44_2010  | L2      | Typhimurium | 313  | Africa    | Ghana        |
| 16549_7#53  | 16549_7#53_2010  | L2      | Typhimurium | 313  | Africa    | Ghana        |
| 16549_7#59  | 16549_7#59_2010  | L2      | Typhimurium | 313  | Africa    | Ghana        |
| 16549_7#75  | 16549_7#75_2010  | L2      | Typhimurium | 313  | Africa    | Ghana        |
| 16549_7#77  | 16549_7#77_2010  | L2      | Typhimurium | 313  | Africa    | Ghana        |
| 16549_7#90  | 16549_7#90_2010  | L2      | Typhimurium | 313  | Africa    | Ghana        |
| 21631_4#153 | 21631_4#153_2010 | L2      | Typhimurium | 313  | Africa    | Ghana        |
| 21631_4#23  | 21631_4#23_2010  | L2      | Typhimurium | 313  | Africa    | Ghana        |
| 21631_5#141 | 21631_5#141_2010 | L2      | Typhimurium | 313  | Africa    | Ghana        |
| 21631_5#63  | 21631_5#63_2010  | L2      | Typhimurium | 313  | Africa    | Ghana        |
| 21631_5#70  | 21631_5#70_2010  | L2      | Typhimurium | 313  | Africa    | Ghana        |
| 21631_5#8   | 21631_5#8_2010   | L2      | Typhimurium | 313  | Africa    | Ghana        |
| 16404_5#39  | 16404_5#39_2011  | L2      | Typhimurium | 313  | Africa    | Ghana        |
| 16404_5#49  | 16404_5#49_2011  | L2      | Typhimurium | 313  | Africa    | Ghana        |
| 16404_5#5   | 16404_5#5_2011   | L2      | Typhimurium | 313  | Africa    | Ghana        |
| 16404_5#70  | 16404_5#70_2011  | L2      | Typhimurium | 313  | Africa    | Ghana        |
| 16549_7#13  | 16549_7#13_2011  | L2      | Typhimurium | 313  | Africa    | Ghana        |
| 16549_7#41  | 16549_7#41_2011  | L2      | Typhimurium | 313  | Africa    | Ghana        |
| 16549_7#48  | 16549_7#48_2011  | L2      | Typhimurium | 313  | Africa    | Ghana        |
| 16549_8#24  | 16549_8#24_2011  | L2      | Typhimurium | 313  | Africa    | Ghana        |
| 21631_4#112 | 21631_4#112_2011 | L2      | Typhimurium | 313  | Africa    | Ghana        |
| 21631_4#139 | 21631_4#139_2011 | L2      | Typhimurium | 313  | Africa    | Ghana        |
| 21631_4#43  | 21631_4#43_2011  | L2      | Typhimurium | 313  | Africa    | Ghana        |
| 21631_4#69  | 21631_4#69_2011  | L2      | Typhimurium | 313  | Africa    | Ghana        |
| 21631_4#81  | 21631_4#81_2011  | L2      | Typhimurium | 313  | Africa    | Ghana        |
| 21631_5#102 | 21631_5#102_2011 | L2      | Typhimurium | 313  | Africa    | Ghana        |
| 21631_5#105 | 21631_5#105_2011 | L2      | Typhimurium | 313  | Africa    | Ghana        |
| 21631_5#75  | 21631_5#75_2011  | L2      | Typhimurium | 313  | Africa    | Ghana        |
| 21631_5#89  | 21631_5#89_2011  | L2      | Typhimurium | 313  | Africa    | Ghana        |
| 16399_3#45  | 16399_3#45_2012  | L2      | Typhimurium | 313  | Africa    | Ghana        |
| 16404_4#79  | 16404_4#79_2012  | L2      | Typhimurium | 313  | Africa    | GuineaBissau |
| 16404_5#27  | 16404_5#27_2012  | L2      | Typhimurium | 313  | Africa    | Ghana        |
| 16404_5#38  | 16404_5#38_2012  | L2      | Typhimurium | 313  | Africa    | Ghana        |
| 16404_5#56  | 16404_5#56_2012  | L2      | Typhimurium | 313  | Africa    | BurkinaFaso  |
| 16404_5#87  | 16404_5#87_2012  | L2      | Typhimurium | 313  | Africa    | Ghana        |
| 16404_6#7   | 16404_6#7_2012   | L2      | Typhimurium | 313  | Africa    | Kenya        |

|             |                  |    |             |     |        |             |
|-------------|------------------|----|-------------|-----|--------|-------------|
| 16549_7#50  | 16549_7#50_2012  | L2 | Typhimurium | 313 | Africa | Ghana       |
| 21631_4#116 | 21631_4#116_2012 | L2 | Typhimurium | 313 | Africa | Ghana       |
| 21631_4#121 | 21631_4#121_2012 | L2 | Typhimurium | 313 | Africa | Ghana       |
| 21631_4#126 | 21631_4#126_2012 | L2 | Typhimurium | 313 | Africa | Ghana       |
| 21631_4#130 | 21631_4#130_2012 | L2 | Typhimurium | 313 | Africa | Ghana       |
| 21631_4#136 | 21631_4#136_2012 | L2 | Typhimurium | 313 | Africa | Ghana       |
| 21631_4#137 | 21631_4#137_2012 | L2 | Typhimurium | 313 | Africa | Ghana       |
| 21631_5#114 | 21631_5#114_2012 | L2 | Typhimurium | 313 | Africa | Ghana       |
| 16404_4#45  | 16404_4#45_2013  | L2 | Typhimurium | 313 | Africa | BurkinaFaso |
| 16404_4#49  | 16404_4#49_2013  | L2 | Typhimurium | 313 | Africa | BurkinaFaso |
| 21631_6#145 | 21631_6#145_2013 | L2 | Typhimurium | 313 | Africa | BurkinaFaso |
| 21631_6#146 | 21631_6#146_2013 | L2 | Typhimurium | 313 | Africa | BurkinaFaso |
| 21631_6#147 | 21631_6#147_2013 | L2 | Typhimurium | 313 | Africa | BurkinaFaso |
| 16399_4#87  | 16399_4#87_2007  | L2 | Typhimurium | 313 | Africa | Ghana       |
| 16399_4#88  | 16399_4#88_2008  | L2 | Typhimurium | 313 | Africa | Ghana       |
| 16399_4#90  | 16399_4#90_2008  | L2 | Typhimurium | 313 | Africa | Ghana       |
| 16399_3#19  | 16399_3#19_2007  | L2 | Typhimurium | 313 | Africa | Ghana       |
| 16399_3#58  | 16399_3#58_2007  | L2 | Typhimurium | 313 | Africa | Ghana       |
| 16399_3#65  | 16399_3#65_2007  | L2 | Typhimurium | 313 | Africa | Ghana       |
| 16399_3#70  | 16399_3#70_2007  | L2 | Typhimurium | 313 | Africa | Ghana       |
| 16399_3#89  | 16399_3#89_2007  | L2 | Typhimurium | 313 | Africa | Ghana       |
| 16399_4#20  | 16399_4#20_2007  | L2 | Typhimurium | 313 | Africa | Ghana       |
| 16399_4#30  | 16399_4#30_2007  | L2 | Typhimurium | 313 | Africa | Ghana       |
| 16399_4#57  | 16399_4#57_2007  | L2 | Typhimurium | 313 | Africa | Ghana       |
| 16399_4#63  | 16399_4#63_2007  | L2 | Typhimurium | 313 | Africa | Ghana       |
| 16404_6#19  | 16404_6#19_2007  | L2 | Typhimurium | 313 | Africa | Ghana       |
| 16404_6#91  | 16404_6#91_2007  | L2 | Typhimurium | 313 | Africa | Ghana       |
| 16549_8#66  | 16549_8#66_2007  | L2 | Typhimurium | 313 | Africa | Ghana       |
| 16549_8#75  | 16549_8#75_2007  | L2 | Typhimurium | 313 | Africa | Ghana       |
| 16549_8#76  | 16549_8#76_2007  | L2 | Typhimurium | 313 | Africa | Ghana       |
| 16399_3#25  | 16399_3#25_2008  | L2 | Typhimurium | 313 | Africa | Ghana       |
| 16399_3#42  | 16399_3#42_2008  | L2 | Typhimurium | 313 | Africa | Ghana       |
| 16399_3#59  | 16399_3#59_2008  | L2 | Typhimurium | 313 | Africa | Ghana       |
| 16399_3#62  | 16399_3#62_2008  | L2 | Typhimurium | 313 | Africa | Ghana       |
| 16399_3#72  | 16399_3#72_2008  | L2 | Typhimurium | 313 | Africa | Ghana       |
| 16399_4#18  | 16399_4#18_2008  | L2 | Typhimurium | 313 | Africa | Ghana       |
| 16399_4#19  | 16399_4#19_2008  | L2 | Typhimurium | 313 | Africa | Ghana       |
| 16399_4#38  | 16399_4#38_2008  | L2 | Typhimurium | 313 | Africa | Ghana       |
| 16399_4#7   | 16399_4#7_2008   | L2 | Typhimurium | 313 | Africa | Ghana       |
| 16404_6#14  | 16404_6#14_2008  | L2 | Typhimurium | 313 | Africa | Ghana       |
| 16404_6#17  | 16404_6#17_2008  | L2 | Typhimurium | 313 | Africa | Ghana       |
| 16404_6#23  | 16404_6#23_2008  | L2 | Typhimurium | 313 | Africa | Ghana       |
| 16404_6#32  | 16404_6#32_2008  | L2 | Typhimurium | 313 | Africa | Ghana       |
| 16549_8#64  | 16549_8#64_2008  | L2 | Typhimurium | 313 | Africa | Ghana       |
| 16549_8#68  | 16549_8#68_2008  | L2 | Typhimurium | 313 | Africa | Ghana       |
| 16549_8#73  | 16549_8#73_2008  | L2 | Typhimurium | 313 | Africa | Ghana       |
| 16549_8#81  | 16549_8#81_2008  | L2 | Typhimurium | 313 | Africa | Ghana       |
| 16404_4#34  | 16404_4#34_2007  | L2 | Typhimurium | 313 | Africa | Ghana       |

|            |                 |    |             |     |        |            |
|------------|-----------------|----|-------------|-----|--------|------------|
| 16399_4#89 | 16399_4#89_2008 | L2 | Typhimurium | 313 | Africa | Ghana      |
| 16399_4#91 | 16399_4#91_2009 | L2 | Typhimurium | 313 | Africa | Ghana      |
| 16404_4#27 | 16404_4#27_2009 | L2 | Typhimurium | 313 | Africa | Ghana      |
| 16404_4#29 | 16404_4#29_2009 | L2 | Typhimurium | 313 | Africa | Ghana      |
| 5116_5#11  | 5116_5#11_1989  | L1 | 100DRC      | 313 | Africa | DRC        |
| 4075_7#10  | 4075_7#10_1991  | L1 | 356DRC      | 313 | Africa | DRC        |
| 5116_6#2   | 5116_6#2_1991   | L1 | 228DRC      | 313 | Africa | DRC        |
| 5116_6#3   | 5116_6#3_1991   | L1 | 265DRC      | 313 | Africa | DRC        |
| 5116_7#3   | 5116_7#3_1991   | L1 | 270DRC      | 313 | Africa | DRC        |
| 5116_7#5   | 5116_7#5_1991   | L1 | 269DRC      | 313 | Africa | DRC        |
| 4075_7#8   | 4075_7#8_1996   | L1 | 2017U       | 313 | Africa | Uganda     |
| 5116_6#5   | 5116_6#5_1996   | L1 | 1905U       | 313 | Africa | Uganda     |
| 4949_2#1   | 4949_2#1_1997   | L1 | A018        | 313 | Africa | Malawi     |
| 4949_2#2   | 4949_2#2_1997   | L1 | A082        | 313 | Africa | Malawi     |
| 4949_3#11  | 4949_3#11_1997  | L1 | A130        | 313 | Africa | Malawi     |
| 5116_6#6   | 5116_6#6_1997   | L1 | 5897U       | 313 | Africa | Uganda     |
| 4949_2#5   | 4949_2#5_1998   | L1 | A680        | 313 | Africa | Malawi     |
| 5116_6#11  | 5116_6#11_1998  | L1 | 6325U       | 313 | Africa | Uganda     |
| 4949_2#6   | 4949_2#6_1999   | L1 | A3800       | 313 | Africa | Malawi     |
| 4949_2#7   | 4949_2#7_1999   | L1 | A4283       | 313 | Africa | Malawi     |
| 4949_2#8   | 4949_2#8_1999   | L1 | A4447       | 313 | Africa | Malawi     |
| 4949_2#10  | 4949_2#10_2000  | L1 | C2167       | 313 | Africa | Malawi     |
| 4949_2#11  | 4949_2#11_2000  | L1 | C2364       | 313 | Africa | Malawi     |
| 4949_2#9   | 4949_2#9_2000   | L1 | C2110       | 313 | Africa | Malawi     |
| 4949_2#12  | 4949_2#12_2001  | L1 | A13198      | 313 | Africa | Malawi     |
| 4949_3#1   | 4949_3#1_2001   | L1 | A13212      | 313 | Africa | Malawi     |
| 4949_3#2   | 4949_3#2_2001   | L1 | D11578      | 313 | Africa | Malawi     |
| 5103_6#10  | 5103_6#10_2001  | L1 | M1174516    | 313 | Africa | Mozambique |
| 5103_6#11  | 5103_6#11_2001  | L1 | M1438312    | 313 | Africa | Mozambique |
| 5103_6#7   | 5103_6#7_2001   | L1 | M1560153    | 313 | Africa | Mozambique |
| 5116_5#1   | 5116_5#1_2001   | L1 | M1553285    | 313 | Africa | Mozambique |
| 5116_5#2   | 5116_5#2_2001   | L1 | M1111568    | 313 | Africa | Mozambique |
| 5116_5#3   | 5116_5#3_2001   | L1 | M1253289    | 313 | Africa | Mozambique |
| 5116_7#8   | 5116_7#8_2001   | L1 | M1175849    | 313 | Africa | Mozambique |
| 4949_3#3   | 4949_3#3_2002   | L1 | A16083      | 313 | Africa | Malawi     |
| 4949_3#5   | 4949_3#5_2002   | L1 | D15040      | 313 | Africa | Malawi     |
| 5103_6#8   | 5103_6#8_2002   | L1 | M1776464    | 313 | Africa | Mozambique |
| 5116_6#10  | 5116_6#10_2002  | L1 | 868U        | 313 | Africa | Uganda     |
| 5116_7#1   | 5116_7#1_2002   | L1 | 334U        | 313 | Africa | Uganda     |
| 4195_2     | 4195_2_2003     | L1 | D22889      | 313 | Africa | Malawi     |
| 4238_7#6   | 4238_7#6_2003   | L1 | 5581        | 313 | Africa | Kenya      |
| 4238_8#8   | 4238_8#8_2003   | L1 | Q175F6      | 313 | Africa | Malawi     |
| 5116_6#4   | 5116_6#4_2003   | L1 | 958U        | 313 | Africa | Uganda     |
| 4075_7#1   | 4075_7#1_2004   | L1 | D25646      | 313 | Africa | Malawi     |
| 4238_7#8   | 4238_7#8_2004   | L1 | 5577        | 313 | Africa | Kenya      |
| 4075_7#12  | 4075_7#12_2005  | L1 | 5597        | 313 | Africa | Kenya      |
| 4238_7#11  | 4238_7#11_2005  | L1 | 5576        | 313 | Africa | Kenya      |
| 4238_7#12  | 4238_7#12_2005  | L1 | 5912        | 313 | Africa | Kenya      |

|           |                |    |          |     |        |            |
|-----------|----------------|----|----------|-----|--------|------------|
| 4238_7#5  | 4238_7#5_2005  | L1 | 5579     | 313 | Africa | Kenya      |
| 5116_5#10 | 5116_5#10_1988 | L2 | 14DRC    | 313 | Africa | DRC        |
| 5116_6#9  | 5116_6#9_1991  | L2 | 254DRC   | 313 | Africa | DRC        |
| 5116_7#4  | 5116_7#4_1991  | L2 | 373DRC   | 313 | Africa | DRC        |
| 5116_6#8  | 5116_6#8_1992  | L2 | 415DRC   | 313 | Africa | DRC        |
| 4949_2#3  | 4949_2#3_1998  | L2 | A357     | 313 | Africa | Malawi     |
| 3673_1    | 3673_1_2002    | L2 | A20      | 313 | Africa | Mali       |
| 3673_2    | 3673_2_2002    | L2 | A40      | 313 | Africa | Mali       |
| 3673_5    | 3673_5_2002    | L2 | A21      | 313 | Africa | Mali       |
| 3673_6    | 3673_6_2002    | L2 | D71      | 313 | Africa | Mali       |
| 3673_7    | 3673_7_2002    | L2 | D83      | 313 | Africa | Mali       |
| 4075_7#7  | 4075_7#7_2002  | L2 | 666U     | 313 | Africa | Uganda     |
| 4238_6#11 | 4238_6#11_2002 | L2 | Q134A    | 313 | Africa | Malawi     |
| 4238_6#12 | 4238_6#12_2002 | L2 | Q367A    | 313 | Africa | Malawi     |
| 4238_6#2  | 4238_6#2_2002  | L2 | Q363A    | 313 | Africa | Malawi     |
| 4238_6#3  | 4238_6#3_2002  | L2 | Q340A    | 313 | Africa | Malawi     |
| 4238_6#5  | 4238_6#5_2002  | L2 | Q285A    | 313 | Africa | Malawi     |
| 4238_6#8  | 4238_6#8_2002  | L2 | Q175A    | 313 | Africa | Malawi     |
| 4238_8#11 | 4238_8#11_2002 | L2 | Q134F9   | 313 | Africa | Malawi     |
| 4949_5#11 | 4949_5#11_2002 | L2 | J17      | 313 | Africa | Mali       |
| 4949_5#12 | 4949_5#12_2002 | L2 | J27      | 313 | Africa | Mali       |
| 4949_5#2  | 4949_5#2_2002  | L2 | C13184   | 313 | Africa | Malawi     |
| 4949_5#3  | 4949_5#3_2002  | L2 | A39051   | 313 | Africa | Malawi     |
| 4949_6#2  | 4949_6#2_2002  | L2 | I3       | 313 | Africa | Mali       |
| 4949_6#3  | 4949_6#3_2002  | L2 | I32      | 313 | Africa | Mali       |
| 4949_6#4  | 4949_6#4_2002  | L2 | I45      | 313 | Africa | Mali       |
| 4949_6#5  | 4949_6#5_2002  | L2 | I7       | 313 | Africa | Mali       |
| 5103_6#9  | 5103_6#9_2002  | L2 | M1605206 | 313 | Africa | Mozambique |
| 5116_6#1  | 5116_6#1_2002  | L2 | 198U     | 313 | Africa | Uganda     |
| 5116_7#2  | 5116_7#2_2002  | L2 | 146U     | 313 | Africa | Uganda     |
| 4238_8#12 | 4238_8#12_2003 | L2 | Q367F2   | 313 | Africa | Malawi     |
| 4238_8#2  | 4238_8#2_2003  | L2 | Q363F3   | 313 | Africa | Malawi     |
| 4238_8#6  | 4238_8#6_2003  | L2 | Q258F4   | 313 | Africa | Malawi     |
| 4238_8#7  | 4238_8#7_2003  | L2 | Q255F4   | 313 | Africa | Malawi     |
| 4949_3#10 | 4949_3#10_2003 | L2 | D23769A  | 313 | Africa | Malawi     |
| 4949_6#1  | 4949_6#1_2003  | L2 | J20      | 313 | Africa | Mali       |
| 5103_6#5  | 5103_6#5_2003  | L2 | M2907772 | 313 | Africa | Mozambique |
| 4075_7#2  | 4075_7#2_2004  | L2 | D25023   | 313 | Africa | Malawi     |
| 4075_7#3  | 4075_7#3_2004  | L2 | D25734   | 313 | Africa | Malawi     |
| 4075_7#4  | 4075_7#4_2004  | L2 | D25248   | 313 | Africa | Malawi     |
| 4075_7#5  | 4075_7#5_2004  | L2 | D26275   | 313 | Africa | Malawi     |
| 4238_8#3  | 4238_8#3_2004  | L2 | Q340F4   | 313 | Africa | Malawi     |
| 4238_8#4  | 4238_8#4_2004  | L2 | Q303F5   | 313 | Africa | Malawi     |
| 5116_7#7  | 5116_7#7_2004  | L2 | M2815310 | 313 | Africa | Mozambique |
| 3901_3    | 3901_3_2005    | L2 | P30      | 313 | Africa | Mali       |
| 4238_8#10 | 4238_8#10_2005 | L2 | Q18F3_S  | 313 | Africa | Malawi     |
| 4238_8#5  | 4238_8#5_2005  | L2 | Q285F5   | 313 | Africa | Malawi     |
| 4949_3#12 | 4949_3#12_2005 | L2 | A38589   | 313 | Africa | Malawi     |

|                    |                         |    |           |     |        |                |
|--------------------|-------------------------|----|-----------|-----|--------|----------------|
| 4949_3#8           | 4949_3#8_2005           | L2 | A32751    | 313 | Africa | Malawi         |
| 4949_3#9           | 4949_3#9_2005           | L2 | A32773    | 313 | Africa | Malawi         |
| 4949_5#1           | 4949_5#1_2005           | L2 | A38596    | 313 | Africa | Malawi         |
| 4949_5#10          | 4949_5#10_2005          | L2 | J3        | 313 | Africa | Mali           |
| 4949_5#6           | 4949_5#6_2005           | L2 | P78       | 313 | Africa | Mali           |
| 4949_5#7           | 4949_5#7_2005           | L2 | P62       | 313 | Africa | Mali           |
| 4949_5#8           | 4949_5#8_2005           | L2 | P73       | 313 | Africa | Mali           |
| 4949_3#4           | 4949_3#4_2006           | L2 | D14916    | 313 | Africa | Malawi         |
| 4949_3#7           | 4949_3#7_2006           | L2 | A24910    | 313 | Africa | Malawi         |
| 4949_5#4           | 4949_5#4_2006           | L2 | A39129    | 313 | Africa | Malawi         |
| 4949_5#5           | 4949_5#5_2006           | L2 | A39155    | 313 | Africa | Malawi         |
| 4949_5#9           | 4949_5#9_2006           | L2 | P51       | 313 | Africa | Mali           |
| 5103_3#9           | 5103_3#9_2009           | L2 | DT2B      | 313 | Europe | United Kingdom |
| 5116_5#5           | 5116_5#5_2009           | L2 | PO609     | 313 | Africa | Nigeria        |
| 5116_5#6           | 5116_5#6_2010           | L2 | PO1124    | 313 | Africa | Nigeria        |
| 5116_5#7           | 5116_5#7_2010           | L2 | PO1140    | 313 | Africa | Nigeria        |
| 5116_5#8           | 5116_5#8_2010           | L2 | PO1276    | 313 | Africa | Nigeria        |
| 4821_1#2           | 4821_1#2_2002           | L2 | D15176    | 313 | Africa | Malawi         |
| 4821_1#3           | 4821_1#3_2002           | L2 | D15759    | 313 | Africa | Malawi         |
| 4821_1#4           | 4821_1#4_2002           | L2 | C5158     | 313 | Africa | Malawi         |
| 4821_1#8           | 4821_1#8_2002           | L2 | D15330    | 313 | Africa | Malawi         |
| 4821_1#9           | 4821_1#9_2002           | L2 | D16287    | 313 | Africa | Malawi         |
| 4821_3#2           | 4821_3#2_2002           | L2 | A16802    | 313 | Africa | Malawi         |
| 4821_1#11          | 4821_1#11_2003          | L2 | D19828    | 313 | Africa | Malawi         |
| 4821_3#5           | 4821_3#5_2003           | L2 | A19741    | 313 | Africa | Malawi         |
| 4821_2#1           | 4821_2#1_2006           | L2 | D36099    | 313 | Africa | Malawi         |
| 4821_2#10          | 4821_2#10_2006          | L2 | D37712    | 313 | Africa | Malawi         |
| 4821_2#11          | 4821_2#11_2006          | L2 | D37905    | 313 | Africa | Malawi         |
| 4821_2#12          | 4821_2#12_2006          | L2 | D37601    | 313 | Africa | Malawi         |
| 4821_2#2           | 4821_2#2_2006           | L2 | D36225    | 313 | Africa | Malawi         |
| 4821_2#3           | 4821_2#3_2006           | L2 | D36435    | 313 | Africa | Malawi         |
| 4821_2#4           | 4821_2#4_2006           | L2 | D36457    | 313 | Africa | Malawi         |
| 4821_2#5           | 4821_2#5_2006           | L2 | D36807    | 313 | Africa | Malawi         |
| 4821_2#7           | 4821_2#7_2006           | L2 | D36233    | 313 | Africa | Malawi         |
| 4821_2#8           | 4821_2#8_2006           | L2 | D36448    | 313 | Africa | Malawi         |
| 4821_2#9           | 4821_2#9_2006           | L2 | D36632    | 313 | Africa | Malawi         |
| 4821_3#8           | 4821_3#8_2008           | L2 | A50070    | 313 | Africa | Malawi         |
| 4821_3#9           | 4821_3#9_2008           | L2 | A50315    | 313 | Africa | Malawi         |
| 02_03_002_FQ312003 | 02_03_002_FQ312003_2002 | L2 | 02-03/002 | 313 | Africa | DRC            |
| 02_03_008_FQ312003 | 02_03_008_FQ312003_2002 | L2 | 02-03/008 | 313 | Africa | DRC            |
| B51_2_FQ312003     | B51_2_FQ312003_2004     | L2 | BL51      | 313 | Africa | Nigeria        |
| BL25_FQ312003      | BL25_FQ312003_2004      | L2 | BL25      | 313 | Africa | Nigeria        |
| 05_102_FQ312003    | 05_102_FQ312003_2005    | L2 | 05/102    | 313 | Africa | DRC            |
| 07_022_FQ312003    | 07_022_FQ312003_2007    | L2 | 07/022    | 313 | Africa | DRC            |
| D23580             | D23580_2004             | L2 | D23580    | 313 | Africa | Malawi         |
| 10868_5#7          | 10868_5#7_2009          | L2 | 8942      | 313 | Africa | Kenya          |
| 10900_4#63         | 10900_4#63_2009         | L2 | 8945      | 313 | Africa | Kenya          |
| 10868_5#3          | 10868_5#3_2010          | L2 | 8947      | 313 | Africa | Kenya          |

|            |                 |    |        |     |        |        |
|------------|-----------------|----|--------|-----|--------|--------|
| 6470_8#6   | 6470_8#6_2010   | L2 | 8891   | 313 | Africa | Kenya  |
| 6470_8#7   | 6470_8#7_2010   | L2 | 8892   | 313 | Africa | Kenya  |
| 10868_5#6  | 10868_5#6_2011  | L2 | 8944   | 313 | Africa | Kenya  |
| 10868_5#8  | 10868_5#8_2011  | L2 | 8948   | 313 | Africa | Kenya  |
| 10900_4#64 | 10900_4#64_2011 | L2 | 8946   | 313 | Africa | Kenya  |
| 10900_4#62 | 10900_4#62_2012 | L2 | 8943   | 313 | Africa | Kenya  |
| 6470_8#8   | 6470_8#8_2009   | L2 | A54560 | 313 | Africa | Malawi |
| 6470_8#9   | 6470_8#9_2009   | L2 | A54285 | 313 | Africa | Malawi |

| Year | This_Study | Study      |
|------|------------|------------|
| 2010 | Yes (TSAP) | This study |
| 2010 | Yes (TSAP) | This study |
| 2010 | Yes (TSAP) | This study |
| 2010 | Yes (TSAP) | This study |
| 2010 | Yes (TSAP) | This study |
| 2010 | Yes (TSAP) | This study |
| 2010 | Yes (TSAP) | This study |
| 2010 | Yes (TSAP) | This study |
| 2010 | Yes (TSAP) | This study |
| 2010 | Yes (TSAP) | This study |
| 2010 | Yes (TSAP) | This study |
| 2010 | Yes (TSAP) | This study |
| 2010 | Yes (TSAP) | This study |
| 2010 | Yes (TSAP) | This study |
| 2010 | Yes (TSAP) | This study |
| 2010 | Yes (TSAP) | This study |
| 2010 | Yes (TSAP) | This study |
| 2010 | Yes (TSAP) | This study |
| 2010 | Yes (TSAP) | This study |
| 2010 | Yes (TSAP) | This study |
| 2010 | Yes (TSAP) | This study |
| 2010 | Yes (TSAP) | This study |
| 2011 | Yes (TSAP) | This study |
| 2011 | Yes (TSAP) | This study |
| 2011 | Yes (TSAP) | This study |
| 2011 | Yes (TSAP) | This study |
| 2011 | Yes (TSAP) | This study |
| 2011 | Yes (TSAP) | This study |
| 2011 | Yes (TSAP) | This study |
| 2011 | Yes (TSAP) | This study |
| 2011 | Yes (TSAP) | This study |
| 2011 | Yes (TSAP) | This study |
| 2011 | Yes (TSAP) | This study |
| 2011 | Yes (TSAP) | This study |
| 2011 | Yes (TSAP) | This study |
| 2011 | Yes (TSAP) | This study |
| 2011 | Yes (TSAP) | This study |
| 2011 | Yes (TSAP) | This study |
| 2011 | Yes (TSAP) | This study |
| 2012 | Yes (TSAP) | This study |
| 2012 | Yes (TSAP) | This study |
| 2012 | Yes (TSAP) | This study |
| 2012 | Yes (TSAP) | This study |
| 2012 | Yes (TSAP) | This study |
| 2012 | Yes (TSAP) | This study |

|      |            |            |
|------|------------|------------|
| 2012 | Yes (TSAP) | This study |
| 2012 | Yes (TSAP) | This study |
| 2012 | Yes (TSAP) | This study |
| 2012 | Yes (TSAP) | This study |
| 2012 | Yes (TSAP) | This study |
| 2012 | Yes (TSAP) | This study |
| 2012 | Yes (TSAP) | This study |
| 2012 | Yes (TSAP) | This study |
| 2013 | Yes (TSAP) | This study |
| 2013 | Yes (TSAP) | This study |
| 2013 | Yes (TSAP) | This study |
| 2013 | Yes (TSAP) | This study |
| 2013 | Yes (TSAP) | This study |
| 2007 | Yes (FISA) | This study |
| 2008 | Yes (FISA) | This study |
| 2008 | Yes (FISA) | This study |
| 2007 | Yes (FISA) | This study |
| 2007 | Yes (FISA) | This study |
| 2007 | Yes (FISA) | This study |
| 2007 | Yes (FISA) | This study |
| 2007 | Yes (FISA) | This study |
| 2007 | Yes (FISA) | This study |
| 2007 | Yes (FISA) | This study |
| 2007 | Yes (FISA) | This study |
| 2007 | Yes (FISA) | This study |
| 2007 | Yes (FISA) | This study |
| 2007 | Yes (FISA) | This study |
| 2007 | Yes (FISA) | This study |
| 2007 | Yes (FISA) | This study |
| 2007 | Yes (FISA) | This study |
| 2008 | Yes (FISA) | This study |
| 2008 | Yes (FISA) | This study |
| 2008 | Yes (FISA) | This study |
| 2008 | Yes (FISA) | This study |
| 2008 | Yes (FISA) | This study |
| 2008 | Yes (FISA) | This study |
| 2008 | Yes (FISA) | This study |
| 2008 | Yes (FISA) | This study |
| 2008 | Yes (FISA) | This study |
| 2008 | Yes (FISA) | This study |
| 2008 | Yes (FISA) | This study |
| 2008 | Yes (FISA) | This study |
| 2008 | Yes (FISA) | This study |
| 2008 | Yes (FISA) | This study |
| 2008 | Yes (FISA) | This study |
| 2008 | Yes (FISA) | This study |
| 2008 | Yes (FISA) | This study |
| 2008 | Yes (FISA) | This study |
| 2008 | Yes (FISA) | This study |
| 2008 | Yes (FISA) | This study |
| 2008 | Yes (FISA) | This study |
| 2008 | Yes (FISA) | This study |
| 2008 | Yes (FISA) | This study |
| 2007 | Yes (FISA) | This study |



|      |            |            |
|------|------------|------------|
| 2008 | Yes (FISA) | This study |
| 2009 | Yes (FISA) | This study |
| 2009 | Yes (FISA) | This study |
| 2009 | Yes (FISA) | This study |
| 1989 | No         | Okoro2012  |
| 1991 | No         | Okoro2012  |
| 1996 | No         | Okoro2012  |
| 1996 | No         | Okoro2012  |
| 1997 | No         | Okoro2012  |
| 1998 | No         | Okoro2012  |
| 1998 | No         | Okoro2012  |
| 1999 | No         | Okoro2012  |
| 1999 | No         | Okoro2012  |
| 1999 | No         | Okoro2012  |
| 2000 | No         | Okoro2012  |
| 2000 | No         | Okoro2012  |
| 2000 | No         | Okoro2012  |
| 2001 | No         | Okoro2012  |
| 2002 | No         | Okoro2012  |
| 2003 | No         | Okoro2012  |
| 2004 | No         | Okoro2012  |
| 2004 | No         | Okoro2012  |
| 2005 | No         | Okoro2012  |
| 2005 | No         | Okoro2012  |
| 2005 | No         | Okoro2012  |



|      |    |                       |
|------|----|-----------------------|
| 2005 | No | Okoro2012             |
| 2006 | No | Okoro2012             |
| 2009 | No | Okoro2012             |
| 2009 | No | Okoro2012             |
| 2010 | No | Okoro2012             |
| 2010 | No | Okoro2012             |
| 2010 | No | Okoro2012             |
| 2002 | No | Msfula2012            |
| 2003 | No | Msfula2012            |
| 2003 | No | Msfula2012            |
| 2006 | No | Msfula2012            |
| 2008 | No | Msfula2012            |
| 2008 | No | Msfula2012            |
| 2002 | No | Leekitcharoenphon2013 |
| 2002 | No | Leekitcharoenphon2013 |
| 2004 | No | Leekitcharoenphon2013 |
| 2004 | No | Leekitcharoenphon2013 |
| 2005 | No | Leekitcharoenphon2013 |
| 2007 | No | Leekitcharoenphon2013 |
| 2004 | No | Kingsley2009          |
| 2009 | No | Kariuki2015           |
| 2009 | No | Kariuki2015           |
| 2010 | No | Kariuki2015           |

|      |    |             |
|------|----|-------------|
| 2010 | No | Kariuki2015 |
| 2010 | No | Kariuki2015 |
| 2011 | No | Kariuki2015 |
| 2011 | No | Kariuki2015 |
| 2011 | No | Kariuki2015 |
| 2012 | No | Kariuki2015 |
| 2009 | No | Feasey2014  |
| 2009 | No | Feasey2014  |
